# Supplementary material for: Enhanced dielectric properties of acrylic resin elastomer based nanocomposite with thermally reduced graphene nanosheets
Source: Royal Society of Chemistry journal article supplement (doi:10.1039/c6ra16932e), 2016-01-01
Supplement: c6ra16932e1.pdf [file c6ra16932e1.pdf]

# Supplementary Information

## Enhanced Dielectric Properties of Acrylic Resin Elastomer based Nanocomposite with Thermally Reduced Graphene Nanosheets

Gaoqiang WANG, Jingwen WANG\*, Shuwei ZHOU, Senqiang WU

\*Jingwen WANG

College of Materials Science and Technology, Nanjing University of Aeronautics & Astronautics, 29  
Yudao Street, Nanjing 210016, P. R. China  
E-mail: wjw\_msc@nuaa.edu.cn

Gaoqiang WANG, Shuwei ZHOU, Senqiang Wu  
Department of Materials Science and Engineering, College of Materials Science and Technology,  
Nanjing University of Aeronautics and Astronautics, Nanjing 211106, P. R. China

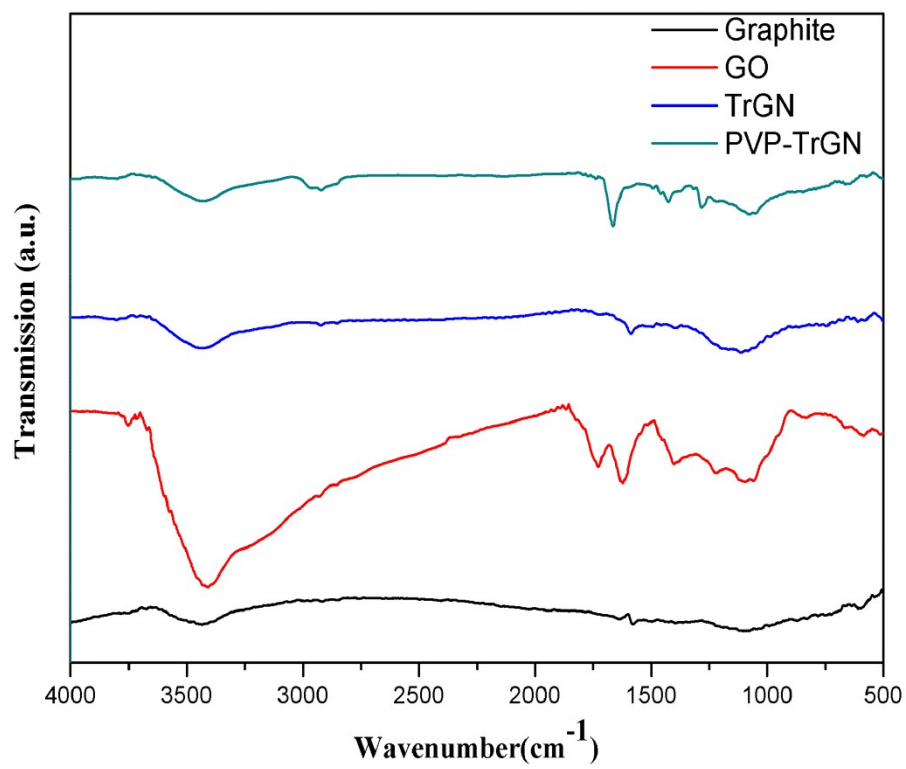

**Figure S1 FTIR spectra of natural graphite, GO, TrGN and PVP-TrGN**

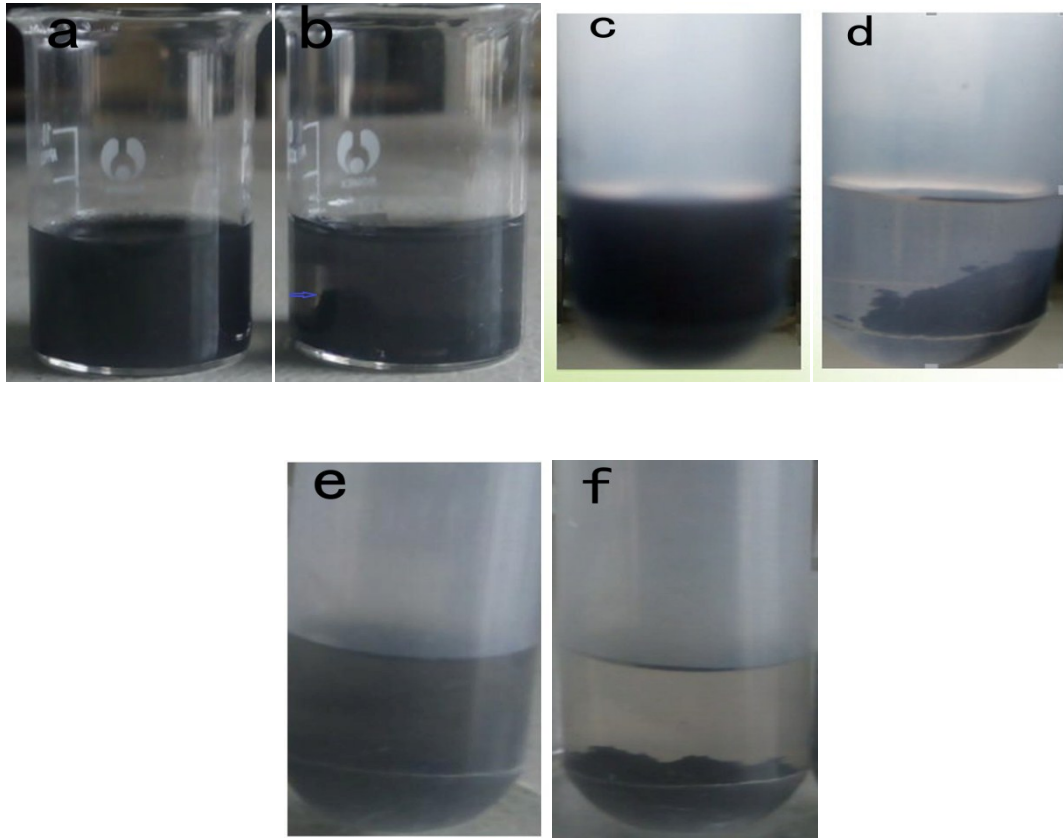

**Figure S2 Dispersion performance comparison of PVP-TrGN (a) (c) (e) and TrGN (b) (d) (f) in DMF (a) (b) after sonication (the arrow in the figure points to the agglomeration of TrGN) (c) (d) after centrifugation (the dispersion was in a centrifuge tube) (e) (f) left overnight (the dispersion was in a centrifuge tube)**

After sonication, the dispersion of PVP-TrGN in DMF was homogeneous, while the TrGN without the modification of PVP presented obvious agglomeration in DMF. After centrifugation, due to absence of PVP, TrGN aggregated and settled at the bottom of the container, however, PVP-TrGN still had a certain ability of dispersion. Furthermore, the upper layer liquid of PVP-TrGN/DMF was still not completely clarified after it had been left overnight.

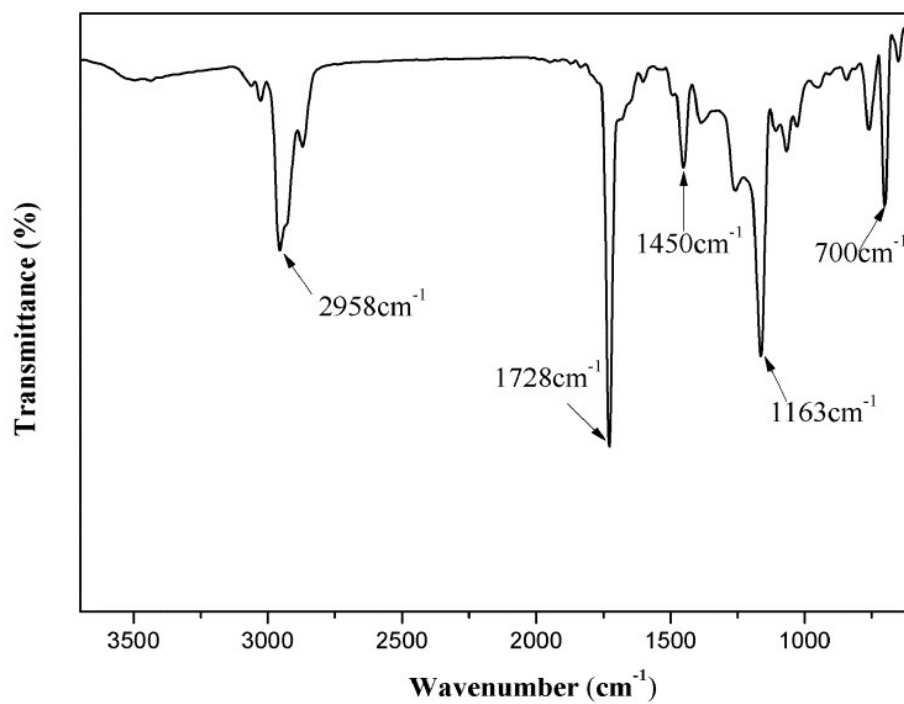

(a)

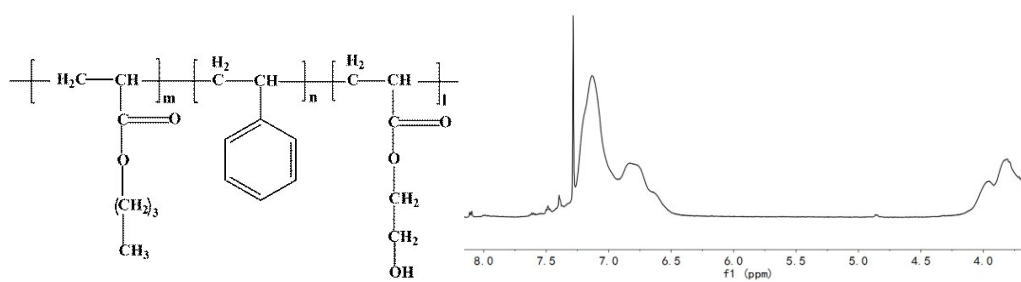

(b)

**Figure S3 (a) FTIR and (b) <sup>1</sup>H-NMR spectrum with chloroform-d as the solvent of neat ARE**

According to the FTIR spectrogram, the absorption peaks appeared at 700, 1450, 1493, 1603 and 3028  $\text{cm}^{-1}$  were associated with benzene ring structure of the styrene. Among these the characteristic peaks at 700  $\text{cm}^{-1}$  and 3028  $\text{cm}^{-1}$  can be assigned to out-of-plane bending vibration and stretching vibration of C-H bond in benzene ring separately. The peaks appeared at 1450  $\text{cm}^{-1}$ , 1493  $\text{cm}^{-1}$  and 1603  $\text{cm}^{-1}$  can be attributed to C=C skeleton vibration in benzene ring. The peak at 1163  $\text{cm}^{-1}$  can be ascribed to stretching vibration of C-O-C in the side chain of ARE. The strongest peak appeared at 1261  $\text{cm}^{-1}$  and the peak at 1728  $\text{cm}^{-1}$  corresponded to the absorption peaks of C-O bond and carbonyl in BA and HEMA separately. The peaks appeared at 1392  $\text{cm}^{-1}$  and 2958  $\text{cm}^{-1}$  were indexed to telescopic vibration of the C-H bond in the methyl.

According to the  $^1\text{H-NMR}$  spectrogram, the wide absorption peak near the chemical shift of 3.607 ppm corresponded to the vibration absorption of methylene adjacent to oxygen atoms (-O-CH<sub>2</sub>) in molecular side chain. The weak peak near 4.810 ppm was attributed to vibration of hydrogen atom in the hydroxyl (-OH). The wide peak at 6.812 ppm can be ascribed to vibration of hydrogen atoms of C-H adjacent to benzene ring in molecular backbone. The absorption peak at 7.132 ppm corresponded to vibration of hydrogen atoms on the ortho and para of styrene in molecular chain. The peak near 7.292 ppm was associated with hydrogen atoms at the meta position of styrene.

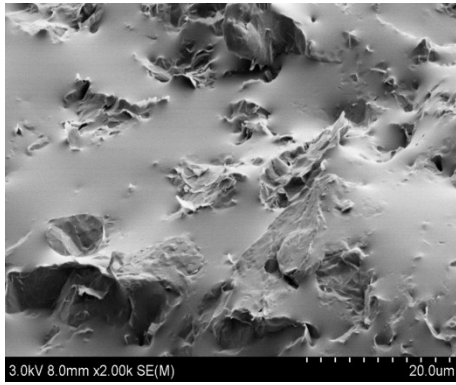

(a)

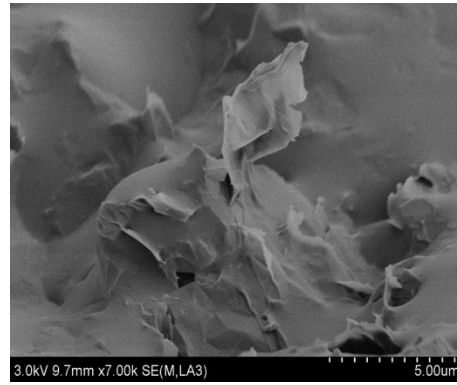

(b)

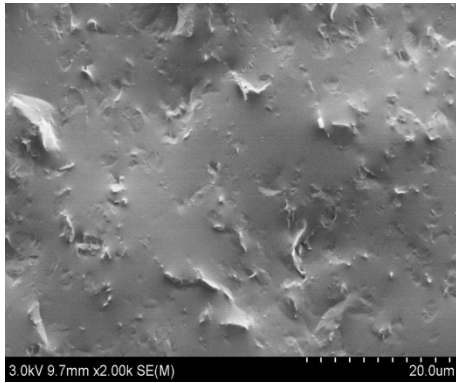

(c)

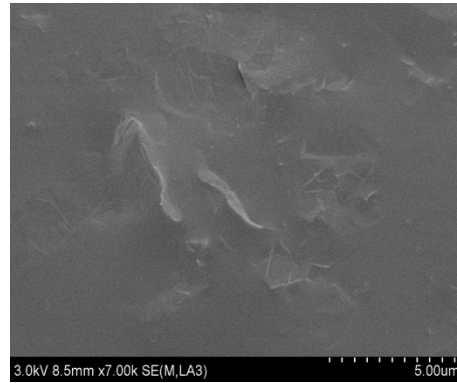

(d)

**Figure S4 SEM images (cross-sectional view) of ARE/0.5% TrGN (a) (b) and ARE/0.5% PVP-TrGN (c) (d). Figs (a) (c) have a magnification of 2000 times and Figs (b) (d) have a magnification of 7000 times**

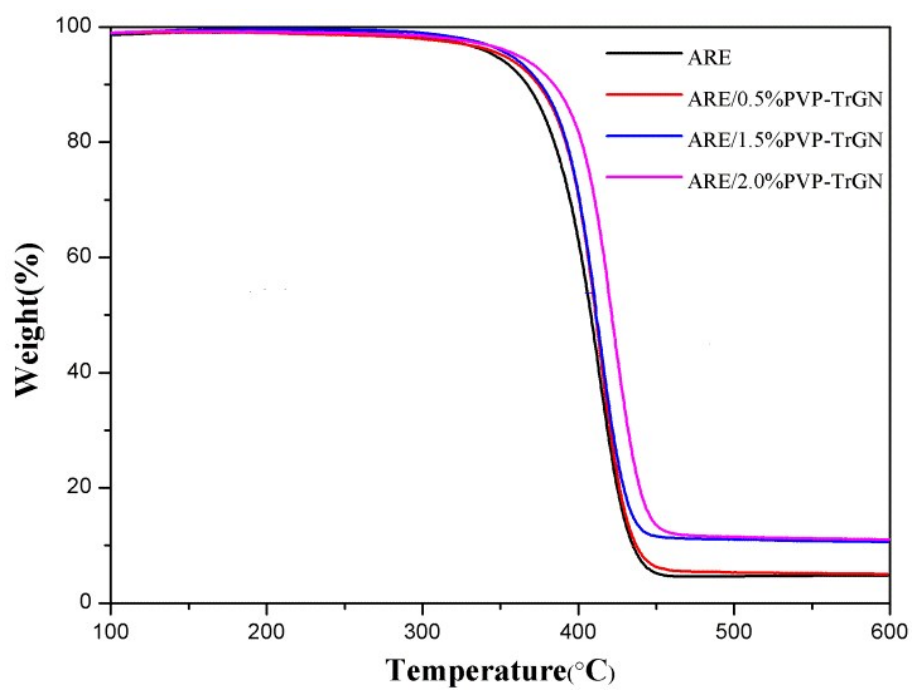

**Figure S5** TG curves for neat ARE and different ARE/PVP-TrGN composites

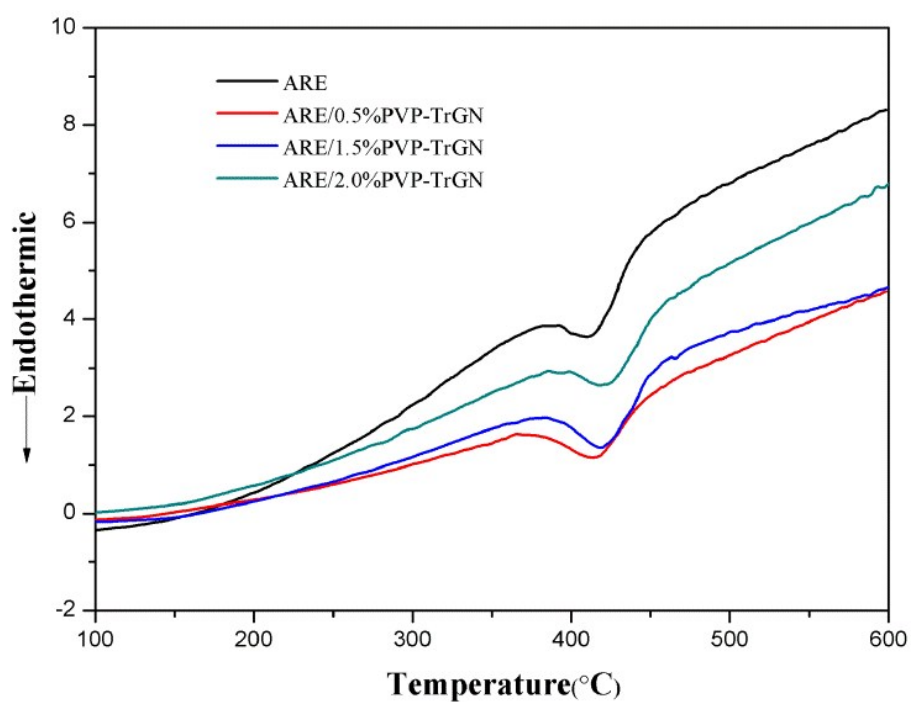

**Figure S6 DSC curves of neat ARE and different ARE/PVP-TrGN composites**
